# Supplementary material for: Immune evasion mediated by PD-L1 on glioblastoma-derived extracellular vesicles
Source: PubMed Central journal article supplement — Sci Adv. 2018 Mar 7;4(3):eaar2766. doi: 10.1126/sciadv.aar2766 (PMC5842038; doi:10.1126/sciadv.aar2766), 2018-03-07
Supplement: aar2766_SM.pdf [file aar2766_SM.pdf]

## Supplementary Materials for **Immune evasion mediated by PD-L1 on glioblastoma-derived extracellular vesicles**

Franz L. Ricklefs, Quazim Alayo, Harald Krenzlin, Ahmad B. Mahmoud, Maria C. Speranza, Hiroshi Nakashima, Josie L. Hayes, Kyunghoon Lee, Leonora Balaj, Carmela Passaro, Arun K. Roj, Susanne Krasemann, Bob S. Carter, Clark C. Chen, Tyler Steed, Jeffrey Treiber, Scott Rodig, Katherine Yang, Ichiro Nakano, Hakho Lee, Ralph Weissleder, Xandra O. Breakefield, Jakub Godlewski, Manfred Westphal, Katrin Lamszus, Gordon J. Freeman, Agnieszka Bronisz, Sean E. Lawler, E. Antonio Chiocca

Published 7 March 2018, *Sci. Adv.* **4**, eaar2766 (2018)  
DOI: 10.1126/sciadv.aar2766

### The PDF file includes:

- fig. S1. Glioblastoma EVs contain PD-L1.
- fig. S2. Glioblastoma EVs are bound to the plasma membrane.
- fig. S3. Glioblastoma EVs that contain PD-L1 bind to PD1.
- fig. S4. IFN- $\gamma$  increases PD-L1-positive EVs in PD-L1<sup>low</sup> GSCs.
- fig. S5. PD-L1 expression correlates with IFN- $\gamma$  response genes.
- fig. S6. EV PD-L1 is found in serum from both glioblastoma patients and healthy controls.
- table S1. EV number and their localization: Fluorescently labeled EVs were added to lymphocytes (5  $\mu$ g/ml) for 3 hours.
- table S2. Short tandem repeat profile of cell lines used in the study.
- table S3. Primers used in the study.
- Legend for movie S1

**Other Supplementary Material for this manuscript includes the following:**  
(available at [advances.sciencemag.org/cgi/content/full/4/3/eaar2766/DC1](https://advances.sciencemag.org/cgi/content/full/4/3/eaar2766/DC1))

- movie S1 (.mov format). PalmtdT EV bound to CD3<sup>+</sup> T cell.

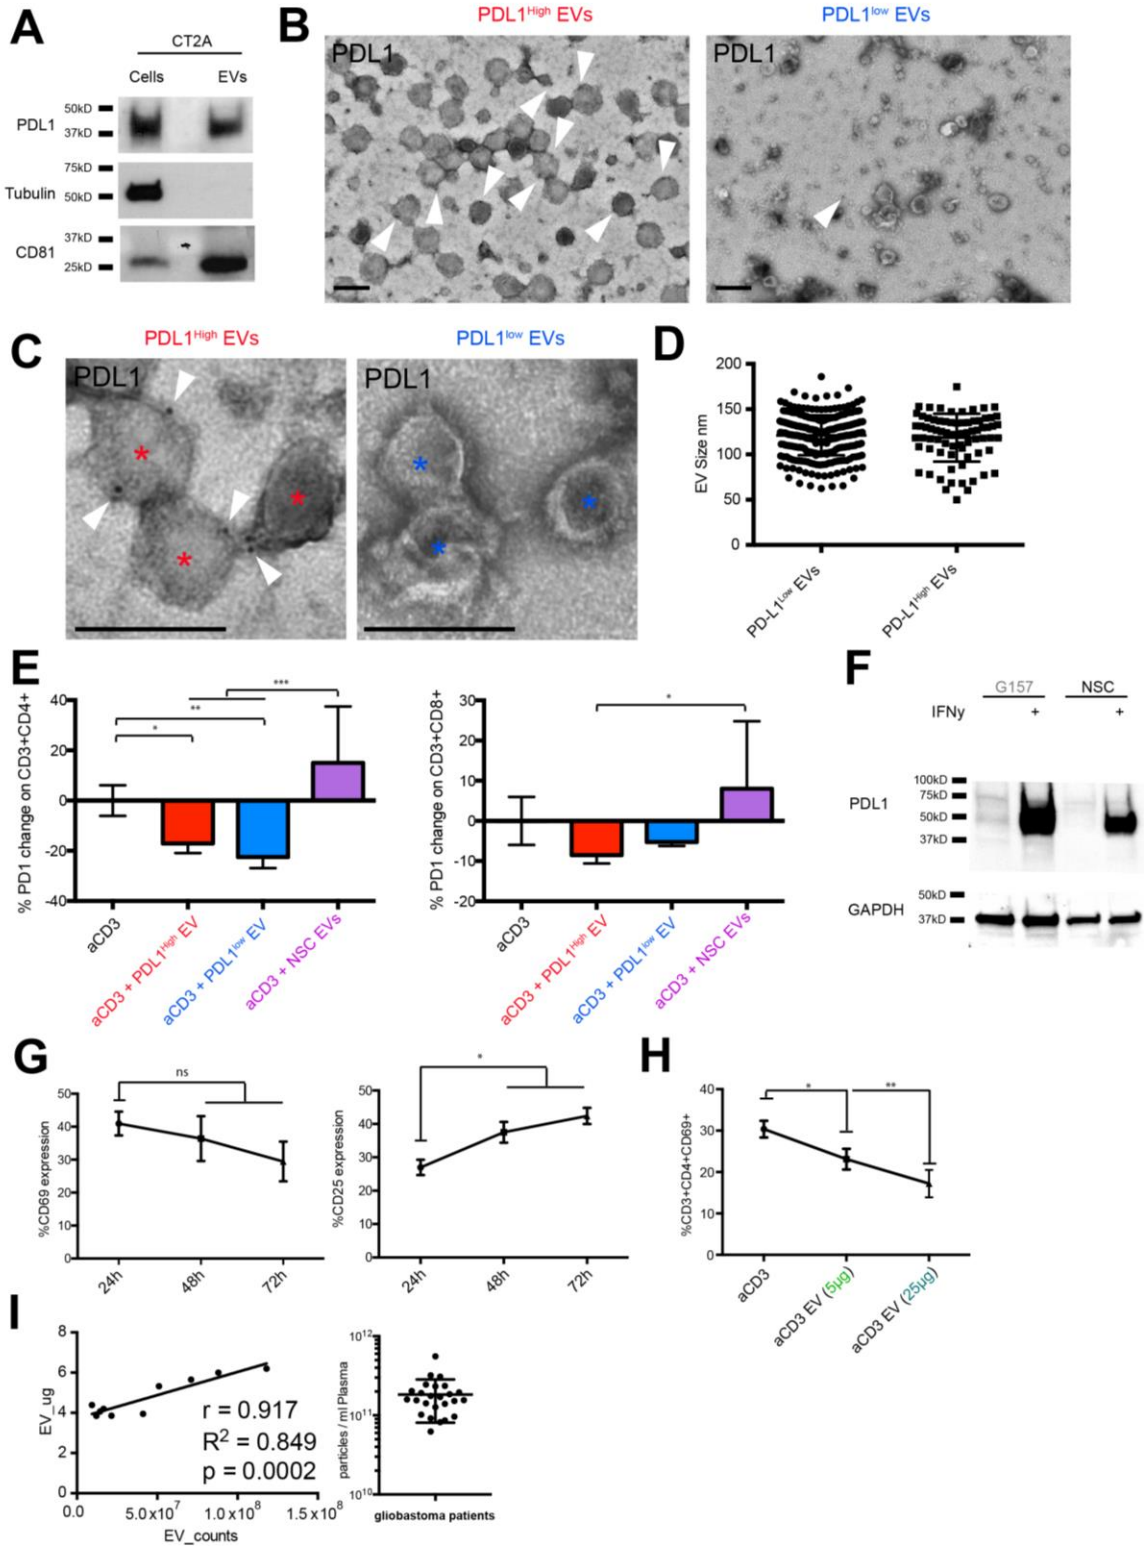

**fig. S1. Glioblastoma EVs contain PD-L1.** (A), Murine glioblastoma CT2A cells and EVs carry PD-L1 (B & C), PD-L1 immunolabeled PD-L1<sup>High</sup> and PD-L1<sup>Low</sup> glioblastoma EVs are shown, triangle indicates gold-immunolabeled PD-L1, scale bar = 200 nm, different magnifications. (D), size distribution between PD-L1<sup>High</sup> and PD-L1<sup>Low</sup> vesicles. (E), PD-L1<sup>high/low</sup> EVs lead to a significant percentage decrease of PD1 in CD3+CD4+ (left panel) and CD3+CD8+ cells (right panel) (n=4, mean ± sd). (F). NSCs do not express detectable PD-L1, but it is inducible by IFN-γ (G). CD69 expression does not change significantly after 48 and 72 h while CD25 expression increases at 48h. CD69 and CD25 expression were measured by flow cytometry after anti-CD3 treatment (n=2). (H), GSC EVs inhibit T-cell activation in a dose-dependent manner as assessed by CD69 levels (n=3, mean ± sd). Datasets include EVs from four different GSCs. (I). EVs from plasma of human glioblastoma patients were analyzed for number and protein content (μg). **left panel**, Correlation between EV number and protein content (n= 10); **right panel**, EV amount per ml plasma of glioblastoma patients (n=24). Analysis was performed by one-way ANOVA, with post-hoc Bonferroni's correction (\*\*\*\* = p<0.0001, \*\*\* = p<0.001, \*\* = p<0.01, \* = p<0.05).

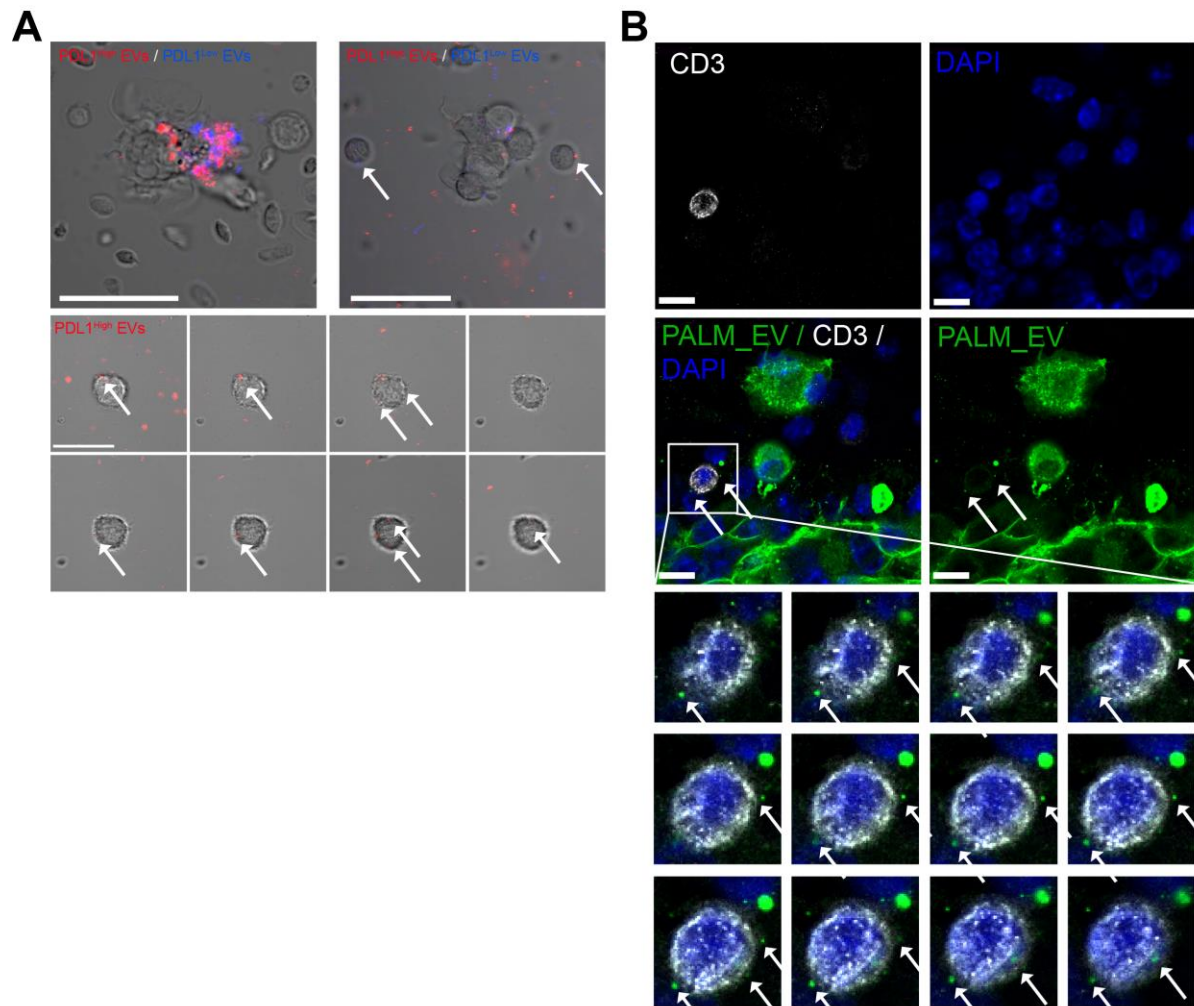

**fig. S2. Glioblastoma EVs are bound to the plasma membrane.** (A), GSC EVs can either be internalized or stick to the outer membrane of PBMCs. Confocal microscopy of PD-L1<sup>high</sup> palmtdT (red) and PD-L1<sup>low</sup> palm-GFP labeled EVs (blue) is shown. White arrows indicate EVs bound to the outer membrane. Scale bar = 20µm. lower panel: z-stack of CD3+ isolated lymphocytes with palmtdT-PD-L1<sup>high</sup> EVs. (B). Glioblastoma EVs co-localize with CD3+ cells *in vivo*. 100,000 CT2A-PALM-GFP labeled mouse syngeneic glioma cells were injected and established in the brains of C57BL/6 mice. 18 days later, mice were euthanized when symptomatic, their brains were harvested and stained for GFP (to detect CT2A tumor cells and

CT2A EVs) and for CD3 (white) to detect T-cells. Confocal images for PALM-GFP-EVs (green) and CD3+ (white) cells are shown. scale bar = 10 $\mu$ m.

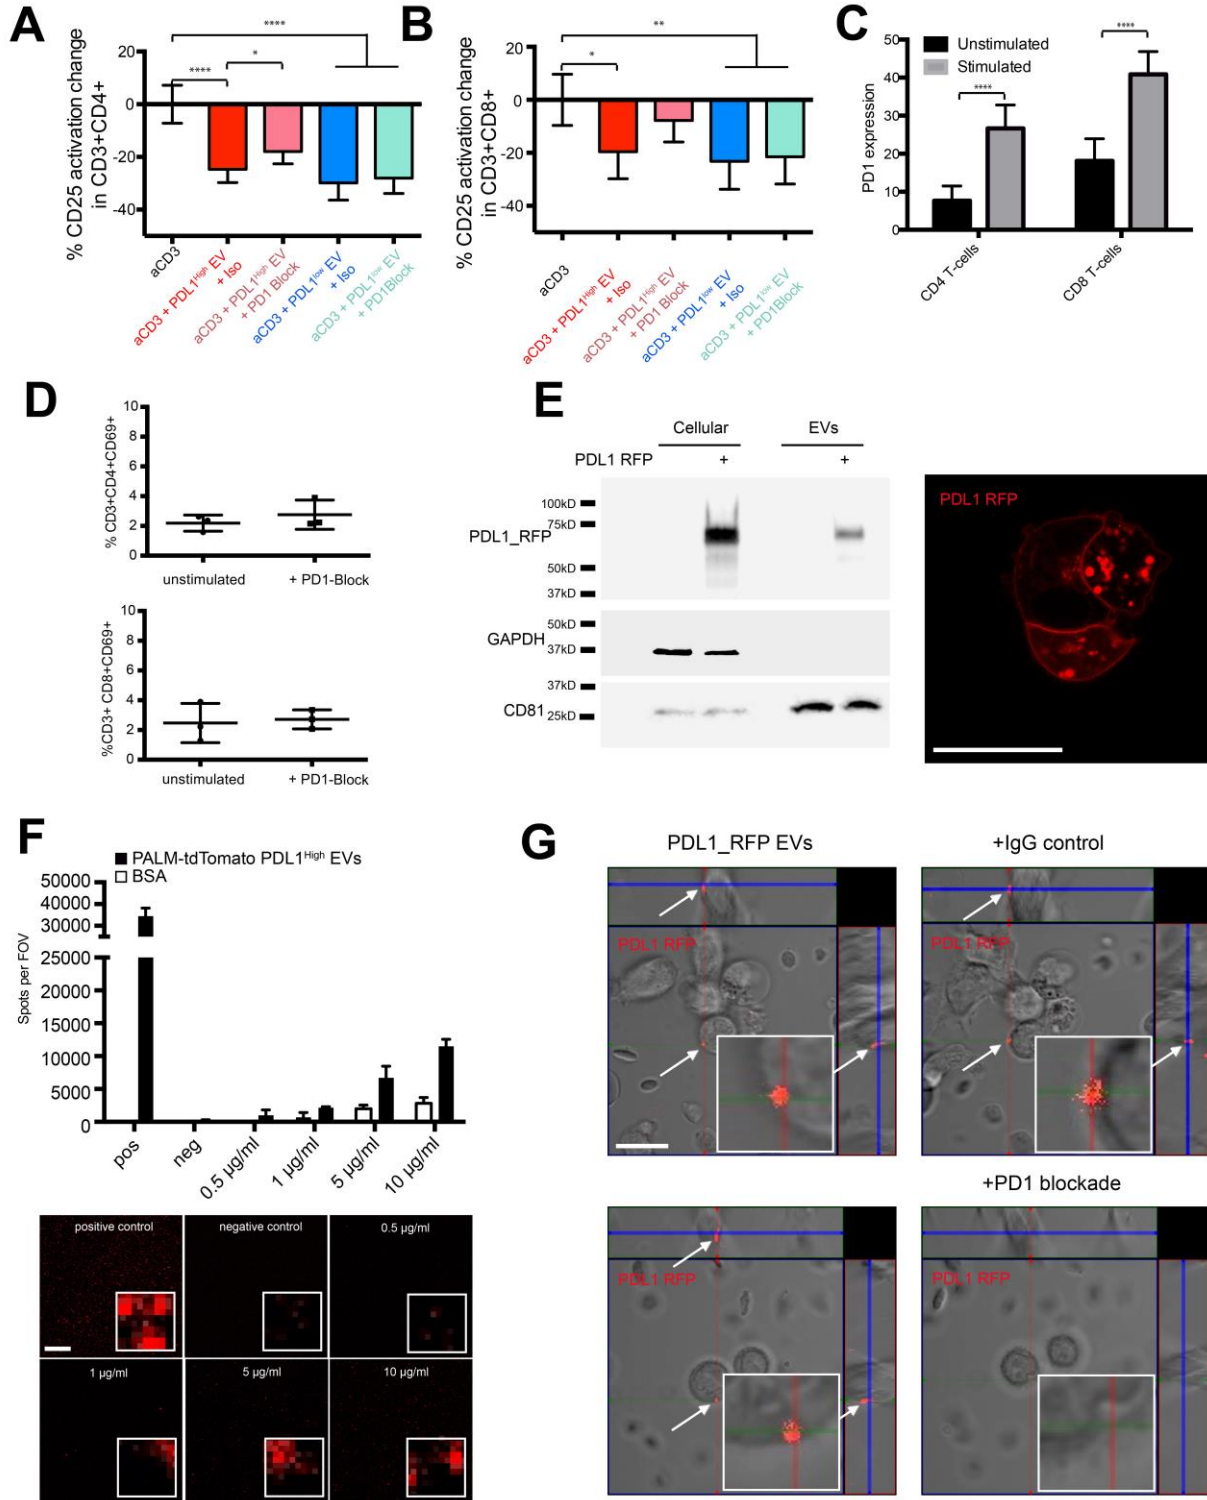

**fig. S3. Glioblastoma EVs that contain PD-L1 bind to PD1.** (A-B) PD1 blockade prevents the inhibition of PD-L1<sup>High</sup> GSC EVs on PBMCs. %CD25 expression change for CD4+ (A) and CD8+ (B) T cells. PD1 blocking antibody (10 µg/ml) or Isotype control (10 µg/ml) was added at day 0 (n=7 PBMC donors, mean ± sd). (C), PD1 expression increases through TCR activation, PD1 expression measured by flow cytometry is shown (n=6) (D), Anti-PD1 blockade does not activate T cells. Anti-PD1 antibody was added to unstimulated PBMCs. CD25 expression was measured in CD3+CD4+ and CD3+CD8+ cells. (E). PD-L1<sup>high</sup> EVs bind to plate-bound purified PD1 in a dose dependent manner. PD-L1 carrying palmtdT-labeled EVs were incubated with plate-bound PD1 or plate-bound BSA as control. Scale bar = 50µm (inserts shown at 500x magnification) (n=4, mean ± sd). (F), PD-L1\_RFP is found in cells and EVs by immunoblotting and confocal imaging. Scale bar = 10µm. PD-L1 on EVs can bind to the surface of CD3+ sorted T-cells and are displaced by PD1 blockade. Scale bar = 20µm. (G), After 30 min incubation at 37°C with either IgG control or PD1-blocking antibody serial images were obtained. Scale bar = 10µm, 500x magnification inserts. High resolution confocal images are shown of PD-L1-RFP carrying EVs (bottom left), Scale bar = 20µm.

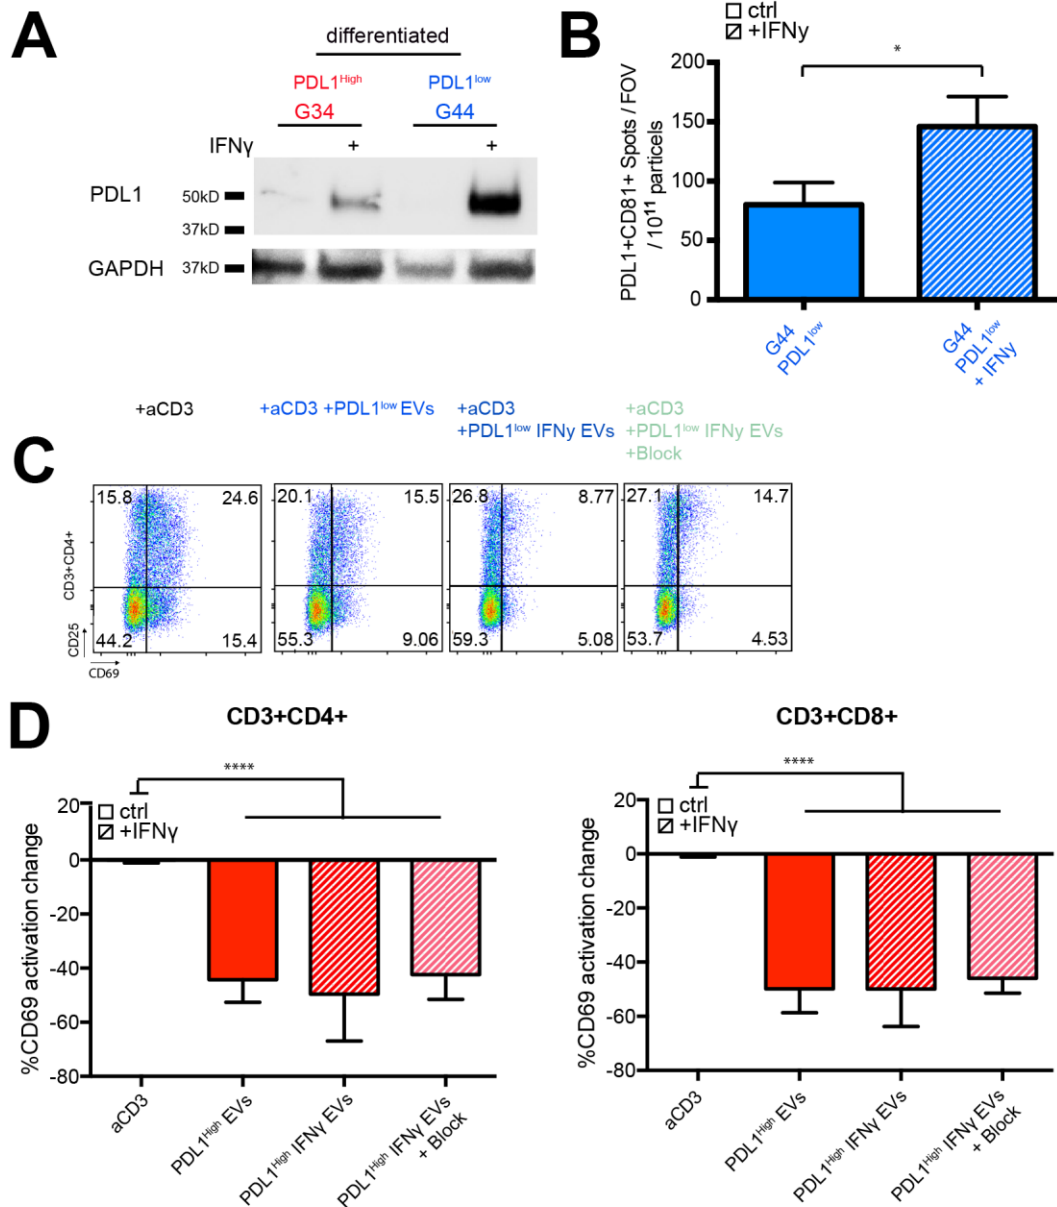

**fig. S4. IFN- $\gamma$  increases PD-L1–positive EVs in PD-L1<sup>low</sup> GSCs.** (A), Differentiated GSCs upregulate their PD-L1 through IFN- $\gamma$  (B), CD81 positive EVs derived from GSCs have elevated PD-L1 after IFN- $\gamma$  stimulation as determined by ELISA sandwich fluorescent measurement. (C), representative FACS scatter plots are shown for IFN- $\gamma$  EV treatments and PD1:PD-L1 blockade., (D), EVs derived from IFN- $\gamma$ –treated PD-L1<sup>high</sup> GSCs did not alter anti-CD3-



stimulated T cell activation and this was not reversed by PD1\_PD-L1 blockade. Inhibition potential was measured by the percentage change of CD69+ levels on anti-CD3 stimulated CD3+CD4+ (C) or CD3+CD8+ (D) cells, isolated from 5 human volunteers, mean  $\pm$  sd). Analysis was performed by one-way ANOVA, with post-hoc Bonferroni's correction (\*\*\*\* =  $p < 0.0001$ , \*\*\* =  $p < 0.001$ , \*\* =  $p < 0.01$ , \* =  $p < 0.05$ ). Student's t-test was used to compare 2 groups (\* =  $p < 0,05$ ).

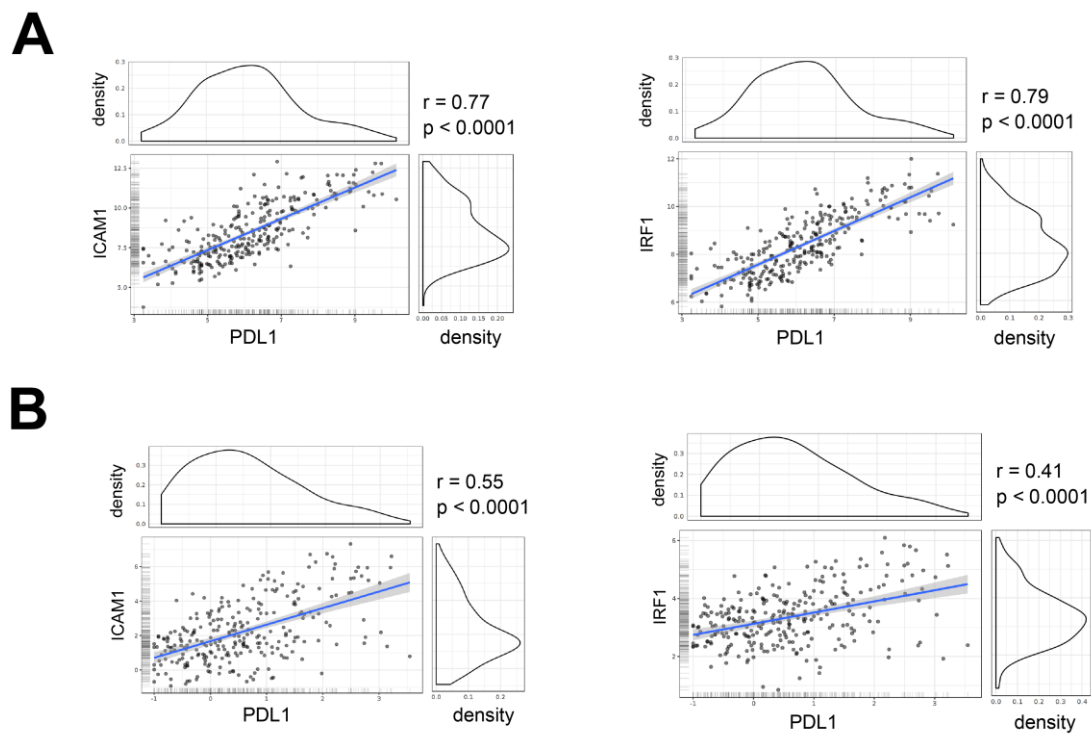

**fig. S5. PD-L1 expression correlates with IFN- $\gamma$  response genes.** (A, B), PD-L1 expression correlates with IFN- $\gamma$  response factor (IRF1), human leukocyte antigen A and intercellular adhesion molecule 1 (ICAM1) levels, ((A) Bao RNA-seq dataset; (B) IVY Gap RNA-seq dataset) RNAseq dataset were obtained from <http://gliovis.bioinfo.cnio.es>

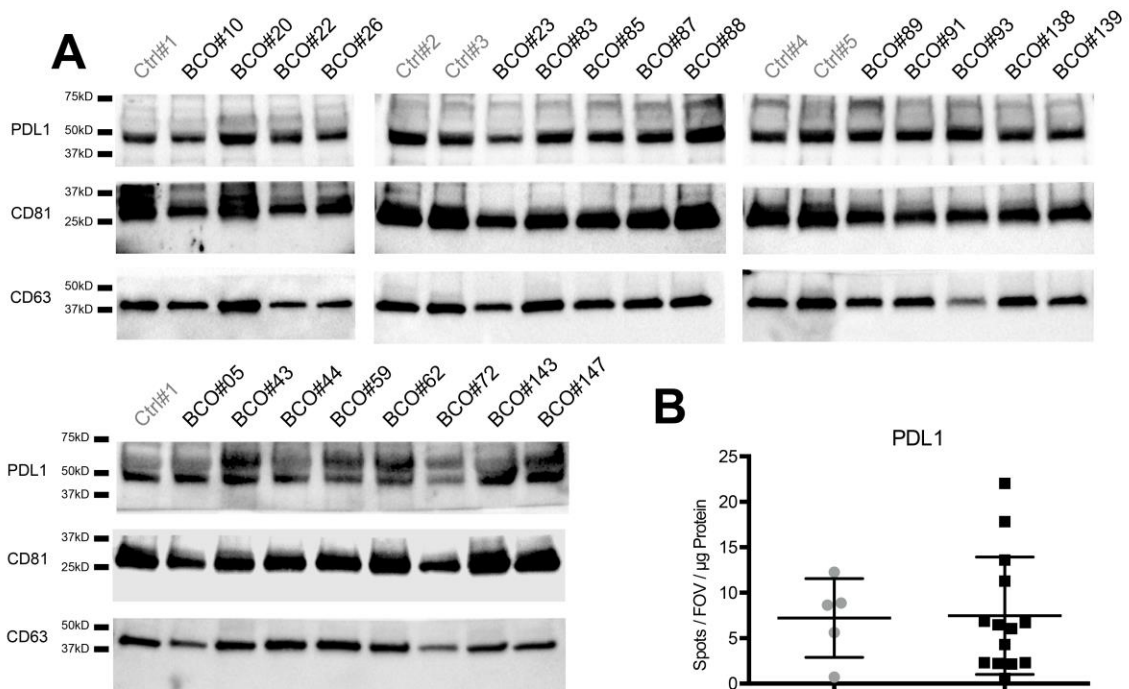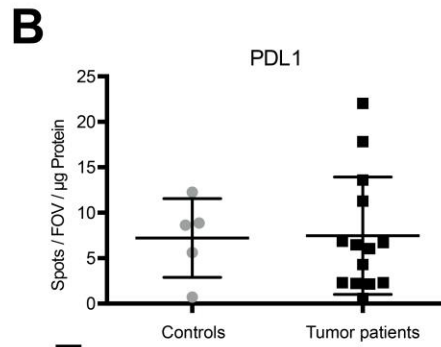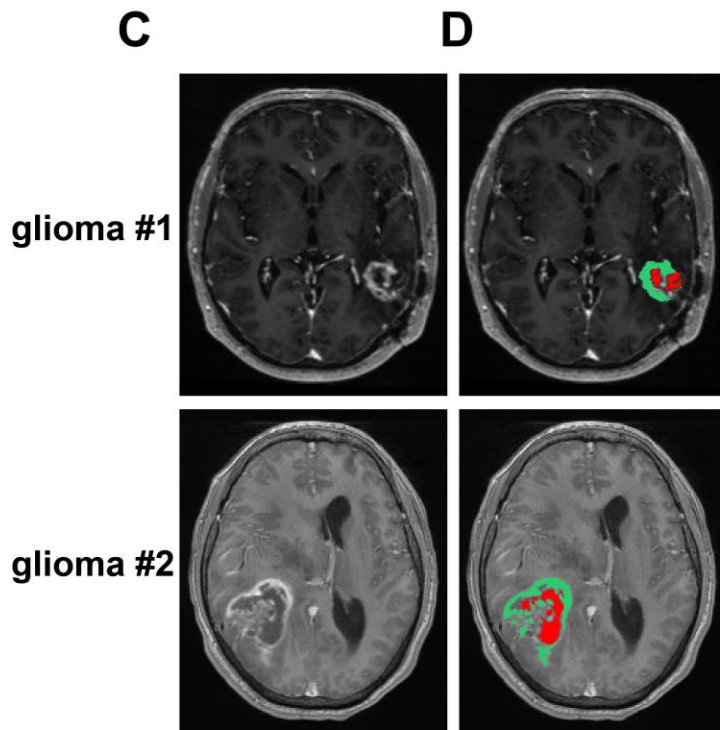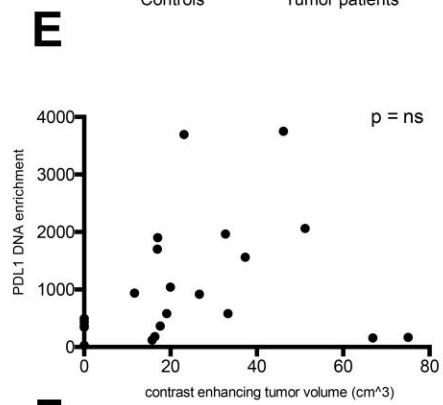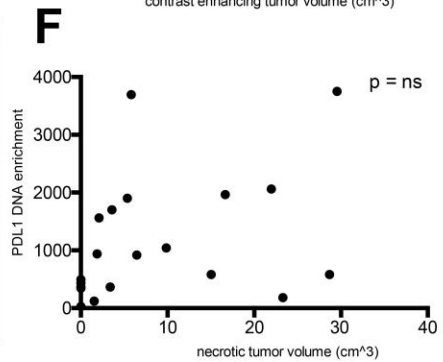

**fig. S6. EV PD-L1 is found in serum from both glioblastoma patients and healthy controls.**

(A), Western blots show that healthy controls and glioblastoma patients carry PD-L1 positive EVs in circulation (controls = 5, glioma patients = 21). (B), Measurements of ELISA-type sandwich analysis show that PD-L1 is not enriched in glioblastoma patients. (C), Representative MRI data of glioblastoma patients are shown. (D), Measurements of contrast enhancing tumor volumes are labeled in green, and necrotic regions labeling in red. (E), PD-L1 DNA enrichment correlates with contrast enhancing tumor volume only for tumors below 60 cm<sup>3</sup>. When the two tumors larger than 60 cm<sup>3</sup> were included in the full cohort, the correlation was lost (p = ns). (F), necrotic volumes of glioma tumors did not significantly correlate with PD-L1 DNA enrichment. (p = ns)

**table S1. EV number and their localization: Fluorescently labeled EVs were added to lymphocytes (5 µg/ml) for 3 hours.** High resolution confocal microscopy was used to visualize EVs either being internalized or co-localized with the plasma membrane. Four randomly selected pictures (pic) were analyzed for the amount of EVs.

| <b>icture ID</b> | <b>Internalized</b> | <b>Co-localized with membrane</b> | <b>Total cell</b> |
|------------------|---------------------|-----------------------------------|-------------------|
| <b>pic 1</b>     | 3                   | 1                                 | <b>3</b>          |
| <b>pic 2</b>     | 13                  | 4                                 | <b>6</b>          |
| <b>pic 3</b>     | 6                   | 6                                 | <b>5</b>          |
| <b>pic 4</b>     | 8                   | 5                                 | <b>3</b>          |

**table S2. Short tandem repeat profile of cell lines used in the study.**

|         | G34 | G35 | G44 | G157 |
|---------|-----|-----|-----|------|
| TH01    | 6   | 9   | 6   | 6    |
|         | 8   | 9   | 8   | 7    |
| D5S818  | 12  | 12  | 12  | 11   |
|         | 13  | 13  | 13  | 13   |
| D13S317 | 12  | 12  | 12  | 10   |
|         | 13  | 12  | 13  | 13   |
| D7S820  | 10  | 10  | 10  | 12   |
|         | 12  | 10  | 12  | 12   |
| D16S539 | 8   | 9   | 8   | 9    |
|         | 14  | 9   | 14  | 11   |
| CSF1PO  | 11  | 12  | 11  | 10   |
|         | 11  | 12  | 12  | 12   |
| AMEL    | X   | X   | X   | X    |
|         | Y   | X   | Y   | X    |
| vWA     | 16  | 15  | 16  | 14   |
|         | 18  | 15  | 18  | 19   |
| TPOX    | 8   | 9   | 8   | 9    |
|         | 11  | 9   | 11  | 11   |

**table S3. Primers used in the study.**

| Primer sequence for qPCR        | Gene name |
|---------------------------------|-----------|
| AAGACCCAGACATCAAGGCG            | IL10 For  |
| AGGCATTCTTCACCTGCTCC            | IL10 Rev  |
| GGGAAGCTTATGACGCCTGT            | IDO For   |
| CTGGCTTGCAGGAATCAGGA            | IDO Rev   |
|                                 |           |
| Primer sequence for droplet PCR | Gene name |
| GAGTGGTAAGACCACCACC             | PD-L1 For |
| GGTTTTCTCAGGATCTAATC            | PD-L1 Rev |

**movie S1. PalmtdT EV bound to CD3<sup>+</sup> T cell.** PBMCs were sorted for CD3<sup>+</sup> cells and incubated for 2h with PalmtdT-EVs. Frames were taken every 2 seconds over a time period of 1 minute at 63x magnification.
